# Supplementary material
Source: PubMed Central journal article supplement (PMC8249686)
Supplement: mmc1.pdf [file mmc1.pdf]

**Cell Chemical Biology, Volume 29**

**Supplemental information**

**SARS-COV-2 spike binding to ACE2 in living  
cells monitored by TR-FRET**

**Erika Cecon, Matilda Burridge, Longxing Cao, Lauren Carter, Rashmi Ravichandran, Julie  
Dam, and Ralf Jockers**

**SARS-COV-2 Spike binding to ACE2 in living cells monitored by TR-FRET**

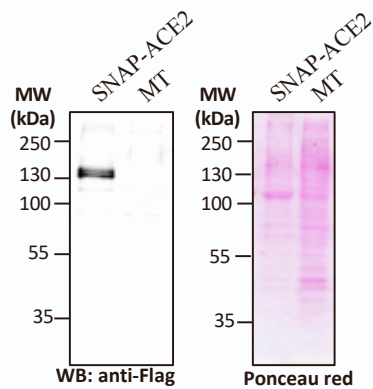

**Figure S1 (related to Figure 1). Validation of SNAP-ACE2 expression in transfected HEK293 cells.** Western blot of SNAP-ACE2 expression in HEK293 cells transfected with 1 $\mu$ g of vector versus mock-transfected (MT) cells. Primary antibody staining against FLAG-tag on SNAP-ACE2 construct; Ponceau red staining used as loading control.

### SARS-COV-2 Spike binding to ACE2 in living cells monitored by TR-FRET

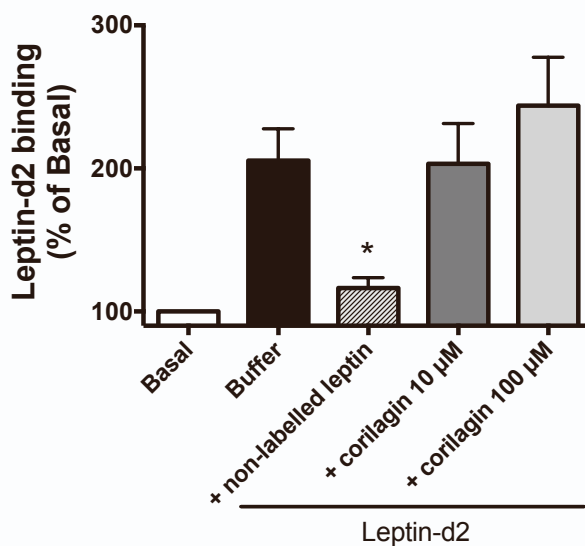

**Figure S2 (related to Figure 2H). Counter-assay TR-FRET test of corilagin.** Effect of corilagin (10 and 100 µM) on the TR-FRET signal resulted from Leptin-d2 (0.5 nM) binding to Lumi4-Tb-SNAP-LepR (leptin receptor) expression in HEK293 cells. Non-specific signal is defined in the presence of excess of non-labelled leptin (100 nM). Data are expressed as mean  $\pm$  SEM of 3 independent experiments, each performed in triplicate. “Leptin-d2 binding” corresponds to the TR-FRET ratio and is expressed as % of basal (absence of d2 ligand). \* $p < 0.05$  by one-way ANOVA followed by Dunnett’s multiple comparisons test compared to the buffer-treated group.

SARS-COV-2 Spike binding to ACE2 in living cells monitored by TR-FRET

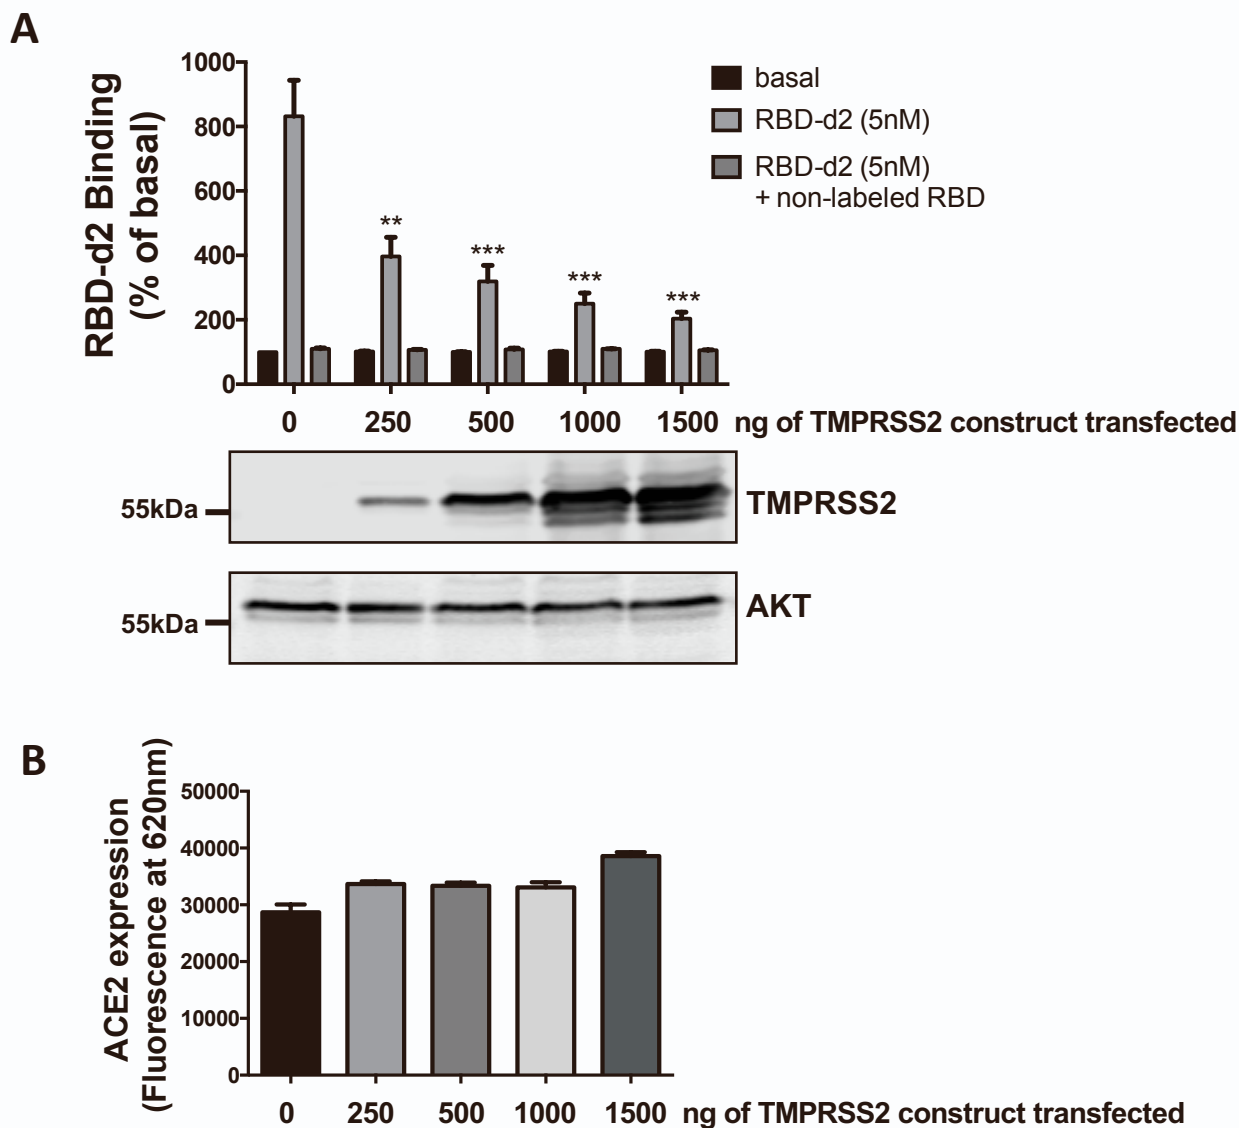

**Figure S3 (related to Figure 3B). Effect of TMPRSS2 on RBD binding to ACE2.** **A)** Binding of RBD-d2 (5 nM) to Lumi4-Tb-labelled SNAP-ACE2 (250 ng of transfected cDNA) in HEK293 cells with and without co-expression of increasing amounts (in ng of transfected cDNA construct) of TMPRSS2 in HEK293 cells. Non-specific signal is defined in the presence of excess of non-labelled RBD (1  $\mu$ M). Data are expressed as mean  $\pm$  SEM of 3 independent experiments, each performed in triplicate. TR-FRET ratio is expressed as % of basal (absence of d2). \*\* $p < 0.01$ ; \*\*\* $p < 0,005$  by one-way ANOVA followed by Dunnett's multiple comparisons test compared to the group 0 (no TMPRSS2 transfection). Bottom: Western blot of TMPRSS2 expression in HEK293 cells transfected with the indicated ng of TMPRSS2 construct. Primary antibody staining against TMPRSS2, or AKT as protein loading control. **B)** Lumi4-Tb-labelled SNAP-ACE2 expression assessed by Tb fluorescence measurement (620 nm). Representative data expressed as mean  $\pm$  SD (n=3).

### SARS-COV-2 Spike binding to ACE2 in living cells monitored by TR-FRET

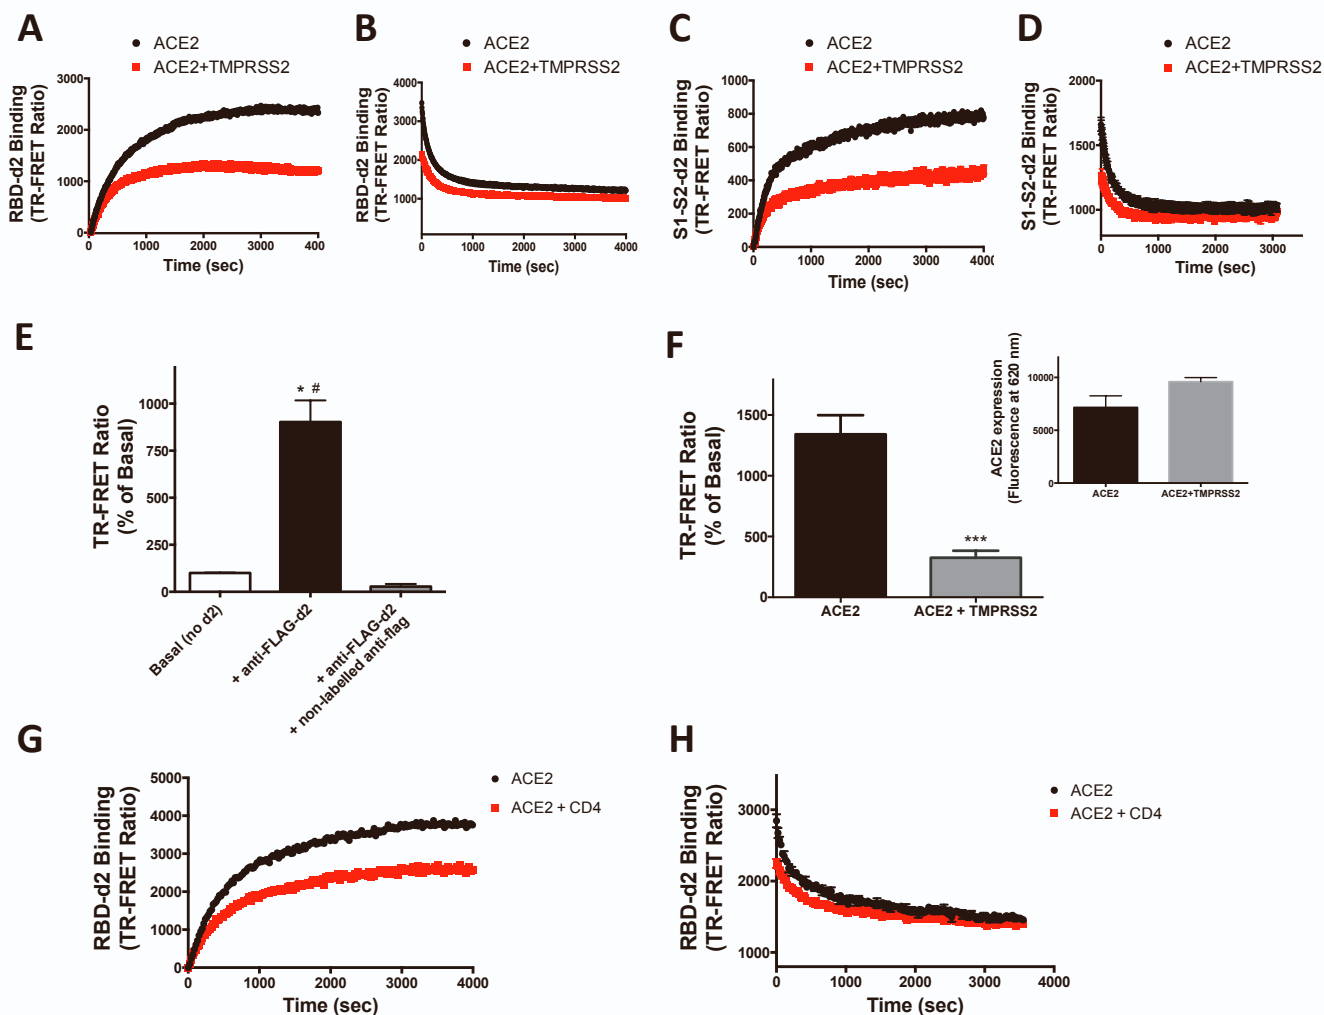

**Figure S4 (related to Figure 3B-I). Effect of TMPRSS2 and CD4 on the kinetics of Spike protein binding to ACE2 and on ACE2 conformation.** Representative curves of association (A,G) and dissociation (B,H) kinetics of RBD-d2 binding (5 nM) to Lumi4-Tb-SNAP-ACE2 in cells co-expressing or not TMPRSS2 (A-B; n=3) or CD4 (G-H; n=3). Dissociation was initiated by adding non-labelled RBD (1  $\mu$ M). Data are expressed as mean  $\pm$  SD of duplicates. C-D) Representative curves of association (C) and dissociation (D) kinetics of S1-S2-d2 binding (20 nM) to Lumi4-Tb-SNAP-ACE2 in cells co-expressing or not TMPRSS2 (n=3). Dissociation was initiated by adding non-labelled S1-S2 (200 nM). Data are expressed as mean  $\pm$  SD of duplicates. E) Intramolecular TR-FRET sensor of ACE2 conformation based on TR-FRET signal between Lumi4-Tb-SNAP-ACE2 and d2-labelled anti-FLAG antibody (2  $\mu$ g/mL). Non-specific signal is defined in the presence of excess of non-labelled anti-FLAG antibody (20  $\mu$ g/mL). Data are expressed as mean  $\pm$  SEM of 3 independent experiments. \* $p$ <0,001 (vs. Basal, one-way ANOVA); # $p$ <0,001 (vs. anti-FLAG-d2 + non-labelled anti-FLAG, one-way ANOVA). F) TR-FRET signal between Lumi4-Tb-SNAP-ACE2 and d2-labelled anti-FLAG antibody in cells expressing only SNAP-ACE2 or co-expressing SNAP-ACE2 and TMPRSS2. Data are expressed as mean  $\pm$  SEM of 3 independent experiments; \*\*\* $p$ <0,001, Student  $t$  test. Insert: Lumi4-Tb-labelled SNAP-ACE2 expression assessed by Tb fluorescence measurement (620 nm). Representative data expressed as mean  $\pm$  SD.

## SARS-COV-2 Spike binding to ACE2 in living cells monitored by TR-FRET

**Table S1 (related to Figure 1). Binding constants of SARS-CoV-2 Spike binding to ACE2 in vitro reported in the literature.**

| Technique   | $K_{on}$<br>( $10^5 \text{ M}^{-1} \text{ s}^{-1}$ ) | $K_{off}$<br>( $10^{-3} \text{ s}^{-1}$ ) | Kinetically derived<br>$K_d = K_{off}/K_{on}$ (nM) | Reference      |
|-------------|------------------------------------------------------|-------------------------------------------|----------------------------------------------------|----------------|
| SPR         | 1.88                                                 | 2.76                                      | 14.7                                               | Wrapp et al.   |
| SPR         | 1.75                                                 | 7.75                                      | 44.2                                               | Shang et al.   |
| SPR         | 0.40                                                 | 3.80                                      | 94.6                                               | Wang et al.    |
| BLI         | 2.80                                                 | 6.0                                       | 22.0                                               | Chan et al.    |
| BLI         | 1.40                                                 | 0.16                                      | 1.2                                                | Walls et al.   |
| BLI         |                                                      |                                           | 20.4                                               | Glasgow et al. |
| SPR         | 3.6                                                  | 9                                         | 26                                                 | Toelzer et al. |
| <b>Mean</b> | <b><math>2.0 \pm 1.1</math></b>                      | <b><math>4.9 \pm 3.3</math></b>           | <b><math>33.8 \pm 33.0</math></b>                  |                |

Mean values were derived from the published studies. SPR, surface plasmon resonance; BLI, biolayer interferometry.
